# Supplementary material for: Biodegradation mechanisms of p-nitrophenol and microflora dynamics in fluidized bed bioreactors
Source: Front Microbiol. 2025 May 14;16:1602768. doi: 10.3389/fmicb.2025.1602768 (PMC12116535; doi:10.3389/fmicb.2025.1602768)
Supplement: Supplementary file 2 [file Data_Sheet_2.xlsx]

## Sheet: AFBBR-COD
Time (days)	Influent COD (mg/L)	Influent PNP (mg/L)	Eff.COD (mg/L)	COD Removal
1	600	10	75.62	0.873967
4	600	10	41.45	0.930917
5	600	10	43.15	0.928083
6	600	10	34.7	0.942167
7	600	10	21.6	0.964
8	600	10	14.05	0.976583
9	600	10	10.7	0.982167
10	650	20	85.25	0.868846
11	650	20	27.6	0.957538
12	650	20	19.55	0.969923
13	650	20	11.55	0.982231
14	650	30	45.85	0.929462
15	650	30	27.65	0.957462
16	650	30	25.11	0.961369
17	700	50	54.3	0.922429
18	700	50	48.75	0.930357
19	700	50	36	0.948571
20	700	50	28	0.96
21	700	60	68.8	0.901714
22	700	60	55.35	0.920929
23	700	60	34.2	0.951143
24	700	60	25	0.964286
25	750	80	121.05	0.8386
26	750	80	66.15	0.9118
27	750	80	48.2	0.935733
28	750	100	149.7	0.8004
29	750	100	123.4	0.835467
30	750	100	89.7	0.8804
31	750	100	66	0.912
32	750	100	67.55	0.909933
33	750	100	56.3	0.924933
34	750	100	57.6	0.9232
35	1350	100	600	0.555556
36	1350	100	490	0.637037
37	1350	100	392.7	0.709111
38	1350	100	456.7	0.661704
39	1350	100	348.9	0.741556
40	1350	100	339.8	0.748296
41	1350	100	341.3	0.747185
42	1055	100	421.3	0.600664
43	1055	100	303.4	0.712417
44	1055	100	381.2	0.638673
45	1055	100	259.1	0.754408
46	1055	100	223.6	0.788057
47	1055	100	201.8	0.80872
48	1055	100	170	0.838863
49	796	100	193.9	0.756285
50	796	100	181.2	0.772247
51	796	100	151.3	0.809829
52	796	100	119	0.850427
53	796	100	129	0.837858
54	796	100	120	0.84917
55	796	100	110	0.86174
56	475	100	298.88	0.371441
57	475	100	159.88	0.663764
58	475	100	191.63	0.596993
59	475	100	141.67	0.702061
60	475	100	112.28	0.76387
61	475	100	121.66	0.744143
62	475	100	111.62	0.765258
63	796	100	260.4	0.6727
64	796	100	266.4	0.665158
65	796	100	204.4	0.743087
66	796	100	144.4	0.818502
67	796	100	129.4	0.837355
68	796	100	108.4	0.863751
69	796	100	111.4	0.85998
70	796	100	284.4	0.642534
71	796	100	206.4	0.740573
72	796	100	210.4	0.735546
73	796	100	204.4	0.743087
74	796	100	234.4	0.70538
75	796	100	94.4	0.881347
76	796	100	100.4	0.873806
77	796	100	398.4	0.499246
78	796	100	86.4	0.891403
79	796	100	176.4	0.778281
80	796	100	196.4	0.753142
81	796	100	100.4	0.873806
82	796	100	79.4	0.900201
83	796	100	79.4	0.900201
84	796	100	190.4	0.760684
85	796	100	180.4	0.773253
86	796	100	162.4	0.795877
87	796	100	112.4	0.858723
88	796	100	91.4	0.885118
89	796	100	89.4	0.887632
90	796	100	90.4	0.886375

## Sheet: AAFBBR-COD
Time (days)	Influent COD (mg/L)	Influent PNP (mg/L)	COD in Anaerobic zone (mg/L)	COD in Aerobic zone (mg/L)	COD Removal
1	600	10	211.6	141	76.5
2	600	10	156.2	106	82.3333
3	600	10	103.1	109	81.8333
4	600	10	77.8	51.3	91.45
5	600	20	80.6	49.9	91.6833
6	600	20	82.9	52.1	91.3167
7	650	20	208.3	115.6	82.2154
8	650	20	200.9	116.9	82.0154
9	650	20	181.6	100.7	84.5077
10	650	20	163.4	103.8	84.0308
11	650	20	160.8	103.1	84.1385
12	650	30	151.8	102.8	84.1846
13	650	30	149.1	103.5	84.0769
14	650	30	221.9	143.3	77.9539
15	650	30	224.6	141.9	78.1692
16	650	40	199.5	118.3	81.8
17	650	40	153.4	102.8	84.1846
18	650	40	211.8	149.9	76.9385
19	650	50	208.1	121.9	81.2462
20	650	50	171.8	115.9	82.1692
21	700	60	191.3	110.1	84.2714
22	700	60	172.8	110.9	84.1571
23	700	80	198.8	104.8	85.0286
24	700	80	166.9	100.7	85.6143
25	750	80	204.7	91.9	87.7467
26	750	100	201.1	92.3	87.6933
27	750	100	120.3	76.5	89.8
28	750	100	198.7	107.1	85.72
29	750	100	181.1	98.3	86.8933
30	750	100	141.1	81.2	89.1733
31	750	100	115.6	75.1	89.9867
32	750	100	112.3	70.2	90.64
33	750	100	113.1	69.8	90.6933
34	750	100	112.1	70.8	90.56
35	1350	100	520.4	452.4	66.4889
36	1350	100	540.4	482.4	64.2667
37	1350	100	450.4	390.4	71.0815
38	1350	100	480.4	440.4	67.3778
39	1350	100	420.4	370.4	72.563
40	1350	100	400.4	352.4	73.8963
41	1350	100	395.4	341.4	74.7111
42	1055	100	390.4	308.4	70.7678
43	1055	100	372.4	300.4	71.5261
44	1055	100	370.4	294.4	72.0948
45	1055	100	268.4	240.4	77.2133
46	1055	100	278.9	220.4	79.109
47	1055	100	248.4	200.1	81.0332
48	1055	100	258.4	184.4	82.5213
49	796	100	280.4	180.4	77.3253
50	796	100	260.4	170.4	78.5822
51	796	100	230.4	158.4	80.0905
52	796	100	210.4	150.4	81.096
53	796	100	210.4	142.4	82.1016
54	796	100	215.4	140.4	82.3529
55	796	100	201.4	120.4	84.8668
56	475	100	260.4	190.4	59.9579
57	475	100	300.4	260.4	45.2366
58	475	100	269.4	200.4	57.8549
59	475	100	201.4	150.4	68.3701
60	475	100	169.4	110.4	76.7823
61	475	100	189.9	120.4	74.6793
62	475	100	175.8	110.4	76.7823
63	796	100	615.9	200.4	74.8115
64	796	100	722.4	276.4	65.2589
65	796	100	742.4	222.4	72.0463
66	796	100	509.4	160.4	79.8391
67	796	100	386.4	120.4	84.8668
68	796	100	200.4	100.8	87.3303
69	796	100	178.4	100.4	87.3806
70	796	100	322.4	161.8	79.6632
71	796	100	281.4	128.4	83.8612
72	796	100	194.4	105.4	86.7521
73	796	100	152.4	76.4	90.3972
74	796	100	130.4	79.4	90.0201
75	796	100	171.4	70.4	91.1513
76	796	100	188.4	80.4	89.8944
77	796	100	198.4	114.4	85.6209
78	796	100	160.4	102.4	87.1292
79	796	100	178.4	91.4	88.5118
80	796	100	142.4	76.4	90.3972
81	796	100	116.4	52.4	93.4138
82	796	100	102.4	40.4	94.9221
83	796	100	106.4	46.4	94.1679
84	796	100	258.4	128.4	83.8612
85	796	100	201.4	109.4	86.2494
86	796	100	141.4	96.4	87.8834
87	796	100	128.4	90.4	88.6375
88	796	100	106.4	74.4	90.6486
89	796	100	112.4	66.4	91.6541
90	796	100	110.4	62.4	92.1569

## Sheet: AFBBR-PNP
Time (days)	Influent PNP (mg/L)	Eff.PNP (mg/L)	PNP Removal
1	10	7.51	0.249
4	10	6.06	0.394
5	10	4.62	0.538
6	10	3.03	0.697
7	10	1.14	0.886
8	10	0.35	0.965
9	10	0.15	0.985
10	20	4.43	0.7785
11	20	2.51	0.8745
12	20	1.38	0.931
13	20	0.49	0.9755
14	30	5.03	0.832333
15	30	3.02	0.899333
16	30	1.01	0.966333
17	50	7.88	0.8424
18	50	5.73	0.8854
19	50	3.69	0.9262
20	50	2.37	0.9526
21	60	11.43	0.8095
22	60	8.06	0.865667
23	60	4.82	0.919667
24	60	2.71	0.954833
25	80	16.02	0.79975
26	80	9.11	0.886125
27	80	4.69	0.941375
28	100	20.18	0.7982
29	100	16.57	0.8343
30	100	10.71	0.8929
31	100	7.12	0.9288
32	100	7.69	0.9231
33	100	5.05	0.9495
34	100	4.95	0.9505
35	100	50.85	0.4915
36	100	47.62	0.5238
37	100	40.11	0.5989
38	100	30.11	0.6989
39	100	37.03	0.6297
40	100	33.99	0.6601
41	100	34.09	0.6591
42	100	35.89	0.6411
43	100	29.22	0.7078
44	100	24.88	0.7512
45	100	21.39	0.7861
46	100	21.99	0.7801
47	100	21.59	0.7841
48	100	20.33	0.7967
49	100	32.66	0.6734
50	100	27.01	0.7299
51	100	20.33	0.7967
52	100	18.52	0.8148
53	100	18.05	0.8195
54	100	18.93	0.8107
55	100	18.23	0.8177
56	100	68.17	0.3183
57	100	35.87	0.6413
58	100	24.65	0.7535
59	100	30.71	0.6929
60	100	25.85	0.7415
61	100	25.58	0.7442
62	100	25.99	0.7401
63	100	26.39	0.7361
64	100	19.76	0.8024
65	100	18.63	0.8137
66	100	15.25	0.8475
67	100	15.43	0.8457
68	100	15.51	0.8449
69	100	15.12	0.8488
70	100	20.33	0.7967
71	100	16.69	0.8331
72	100	15.03	0.8497
73	100	12.08	0.8792
74	100	10.58	0.8942
75	100	12.09	0.8791
76	100	10.03	0.8997
77	100	14.18	0.8582
78	100	13.13	0.8687
79	100	12.34	0.8766
80	100	12.91	0.8709
81	100	11.68	0.8832
82	100	11.91	0.8809
83	100	11.88	0.8812
84	100	20.03	0.7997
85	100	18.01	0.8199
86	100	18.51	0.8149
87	100	17.09	0.8291
88	100	16.55	0.8345
89	100	16.47	0.8353
90	100	16.82	0.8318

## Sheet: AAFBBR-PNP
Time (days)	Influent PNP (mg/L)	PNP in Anaerobic zone (mg/L)	PNP in Aerobic zone (mg/L)	PNP Removal
1	10	2.63	1.27	87.3
2	10	2.82	0.91	90.9
3	10	2.49	0.43	95.7
4	10	1.07	0.31	96.9
5	10	0.48	0.27	97.3
6	10	0.35	0.34	96.6
7	20	5.87	3.29	83.55
8	20	5.51	3.02	84.9
9	20	1.12	1.03	94.85
10	20	2.49	1.41	92.95
11	20	2.01	1.23	93.85
12	20	1.72	0.99	95.05
13	20	1.43	0.89	95.55
14	30	7.15	4.97	83.4333
15	30	7.39	4.89	83.7
16	30	4.29	2.46	91.8
17	30	2.58	1.53	94.9
18	40	7.19	6.66	83.35
19	40	7.01	3.11	92.225
20	40	4.39	2.37	94.075
21	50	8.11	5.37	89.26
22	50	7.71	4.29	91.42
23	60	10.11	6.66	88.9
24	60	9.05	4.91	91.8167
25	80	16.57	9.88	87.65
26	80	14.92	8.11	89.8625
27	80	8.48	6.71	91.6125
28	100	21.93	14.88	85.12
29	100	19.81	12.02	87.98
30	100	16.11	10.01	89.99
31	100	12.92	9.71	90.29
32	100	12.03	9.58	90.42
33	100	11.88	9.51	90.49
34	100	11.99	9.71	90.29
35	100	19.91	12.65	87.35
36	100	24.39	14.99	85.01
37	100	40.56	32.45	67.55
38	100	38.11	30.34	69.66
39	100	38.51	30.03	69.97
40	100	37.03	29.08	70.92
41	100	35.28	28.59	71.41
42	100	42.78	33.01	66.99
43	100	35.24	27.81	72.19
44	100	30.78	23.28	76.72
45	100	28.05	20.07	79.93
46	100	24.41	19.81	80.19
47	100	24.81	19.11	80.89
48	100	24.11	19.01	80.99
49	100	37.89	31.99	68.01
50	100	33.85	26.08	73.92
51	100	26.57	20.31	79.69
52	100	23.17	19.74	80.26
53	100	22.58	17.91	82.09
54	100	22.11	17.81	82.19
55	100	21.75	17.01	82.99
56	100	67.55	47.33	52.67
57	100	42.61	33.31	66.69
58	100	32.81	27.86	72.14
59	100	29.37	25.03	74.97
60	100	29.01	25.17	74.83
61	100	29.21	25.19	74.81
62	100	29.18	24.98	75.02
63	100	30.28	18.92	81.08
64	100	29.3	17.8	82.2
65	100	23.98	15.72	84.28
66	100	20.99	15.11	84.89
67	100	20.48	14.23	85.77
68	100	19.71	12.39	87.61
69	100	19.05	12.01	87.99
70	100	26.07	16.09	83.91
71	100	23.13	14.01	85.99
72	100	21.01	12.99	87.01
73	100	16.59	8.13	91.87
74	100	11.08	5.03	94.97
75	100	11.84	4.59	95.41
76	100	10.21	4.48	95.52
77	100	15.98	11.11	88.89
78	100	14.71	10.09	89.91
79	100	13.01	9.11	90.89
80	100	14.58	8.28	91.72
81	100	15.96	8.01	91.99
82	100	14.77	7.97	92.03
83	100	14.05	7.56	92.44
84	100	17.88	11.01	88.99
85	100	25.62	18.66	81.34
86	100	28.16	18.03	81.97
87	100	26.13	15.35	84.65
88	100	24.97	15.36	84.64
89	100	23.02	13.91	86.09
90	100	23.86	13.99	86.01

## Sheet: AFBBR-TN
Time (days)	Influent TN (mg/L)	Eff.TN (mg/L)	TN Removal
1	1	0.99	0.01
4	1	0.99	0.01
5	1	0.95	0.05
6	1	0.93	0.07
7	1	0.95	0.05
8	1	0.98	0.02
9	1	0.95	0.05
10	2	1.97	0.015
11	2	1.93	0.035
12	2	1.91	0.045
13	2	1.92	0.04
14	3	2.81	0.0633333
15	3	2.73	0.09
16	3	2.71	0.0966667
17	5	3.61	0.278
18	5	3.41	0.318
19	5	4.23	0.154
20	5	4.01	0.198
21	6	3.71	0.381667
22	6	4.23	0.295
23	6	5.26	0.123333
24	6	5.04	0.16
25	8	6.95	0.13125
26	8	6.84	0.145
27	8	6.55	0.18125
28	10	6.02	0.398
29	10	6.35	0.365
30	10	8.82	0.118
31	10	8.66	0.134
32	10	8.27	0.173
33	10	7.91	0.209
34	10	7.68	0.232
35	10	8.39	0.161
36	10	7.91	0.209
37	10	8.88	0.112
38	10	8.37	0.163
39	10	8.11	0.189
40	10	8.08	0.192
41	10	8.05	0.195
42	10	8.38	0.162
43	10	8.12	0.188
44	10	8.01	0.199
45	10	7.85	0.215
46	10	7.46	0.254
47	10	7.52	0.248
48	10	7.49	0.251
49	10	7.97	0.203
50	10	7.29	0.271
51	10	8.66	0.134
52	10	7.44	0.256
53	10	7.29	0.271
54	10	7.31	0.269
55	10	7.29	0.271
56	10	7.79	0.221
57	10	7.94	0.206
58	10	7.66	0.234
59	10	8.23	0.177
60	10	7.89	0.211
61	10	7.79	0.221
62	10	7.75	0.225
63	68.46	54.39	0.205521
64	68.46	59.56	0.130003
65	68.46	49.11	0.282647
66	68.46	42.03	0.386065
67	68.46	43.89	0.358896
68	68.46	41.88	0.388256
69	68.46	40.96	0.401694
70	34.23	25.28	0.261467
71	34.23	29.39	0.141396
72	34.23	30.32	0.114227
73	34.23	20.91	0.389132
74	34.23	17.97	0.475022
75	34.23	17.19	0.497809
76	34.23	17.74	0.481741
77	22.82	13.12	0.425066
78	22.82	12.01	0.473707
79	22.82	12.24	0.463628
80	22.82	12.78	0.439965
81	22.82	12.16	0.467134
82	22.82	12.09	0.470202
83	22.82	12.28	0.461876
84	17.15	9.88	0.423907
85	17.15	10.03	0.41516
86	17.15	9.71	0.433819
87	17.15	9.76	0.430904
88	17.15	9.77	0.430321
89	17.15	9.76	0.430904
90	17.15	9.72	0.433236

## Sheet: AAFBBR-TN
Time (days)	Influent TN (mg/L)	TN in Anaerobic zone (mg/L)	TN in Aerobic zone (mg/L)	TN Removal
1	1	0.76	0.76	24
2	1	0.79	0.72	28
3	1	0.77	0.75	25
4	1	0.81	0.72	28
5	1	0.76	0.71	29
6	1	0.77	0.69	31
7	2	1.91	1.69	15.5
8	2	1.94	1.77	11.5
9	2	1.99	1.79	10.5
10	2	1.91	1.77	11.5
11	2	1.88	1.68	16
12	2	1.93	1.71	14.5
13	2	1.87	1.67	16.5
14	3	2.93	2.58	14
15	3	2.92	2.67	11
16	3	2.77	2.41	19.6667
17	3	2.51	2.41	19.6667
18	4	3.55	2.35	41.25
19	4	3.46	2.38	40.5
20	4	3.11	2.35	41.25
21	5	3.85	2.8	44
22	5	3.09	2.41	51.8
23	6	4.07	3.57	40.5
24	6	3.79	3.34	44.3333
25	8	6.09	5.11	36.125
26	8	6.56	4.91	38.625
27	8	6.01	4.66	41.75
28	10	7.29	4.98	50.2
29	10	7.22	4.99	50.1
30	10	7.08	5.25	47.5
31	10	6.31	4.39	56.1
32	10	6.14	4.11	58.9
33	10	6.07	4.11	58.9
34	10	6.01	4.09	59.1
35	10	5.89	4.38	56.2
36	10	6.07	4.42	55.8
37	10	5.92	4.71	52.9
38	10	7.16	5.77	42.3
39	10	6.73	5.22	47.8
40	10	6.61	5.21	47.9
41	10	6.46	5.26	47.4
42	10	6.48	5.11	48.9
43	10	6.05	5.06	49.4
44	10	6.39	5.13	48.7
45	10	5.95	5.01	49.9
46	10	6.06	4.97	50.3
47	10	6.01	4.92	50.8
48	10	5.92	4.92	50.8
49	10	6.12	5.03	49.7
50	10	6.36	5.67	43.3
51	10	6.07	4.56	54.4
52	10	5.81	4.99	50.1
53	10	5.72	5.12	48.8
54	10	5.68	4.91	50.9
55	10	5.71	4.81	51.9
56	10	5.89	5.11	48.9
57	10	6.45	5.34	46.6
58	10	7.19	6.78	32.2
59	10	6.67	6.06	39.4
60	10	6.92	6.18	38.2
61	10	7.02	6.11	38.9
62	10	6.93	6.09	39.1
63	68.46	50.62	47.11	31.186
64	68.46	56.67	38.56	43.675
65	68.46	53.16	36.46	46.743
66	68.46	54.67	38.56	43.675
67	68.46	54.97	45.41	33.669
68	68.46	52.66	34.46	49.664
69	68.46	51.14	34.41	49.737
70	34.23	26.66	23.03	32.72
71	34.23	25.28	20.33	40.608
72	34.23	24.04	18.88	44.844
73	34.23	23.51	16.89	50.657
74	34.23	22.03	14.68	57.114
75	34.23	20.16	12.02	64.885
76	34.23	20.03	12.42	63.716
77	22.82	15.51	12.41	45.618
78	22.82	16.23	10.88	52.323
79	22.82	15.09	10.02	56.091
80	22.82	14.66	10.44	54.251
81	22.82	13.88	9.03	60.429
82	22.82	14.16	9.19	59.728
83	22.82	14.05	9.08	60.21
84	17.15	10.55	9.01	47.464
85	17.15	11.13	8.77	48.863
86	17.15	10.89	8.53	50.262
87	17.15	11.08	8.06	53.003
88	17.15	11.11	8.09	52.828
89	17.15	11.13	7.94	53.703
90	17.15	11.12	7.91	53.878
